# Supplementary material
Source: HighWire-hosted journal article supplement (https://bmjopen.bmj.com/content/10/8/e033720)
Supplement: inline-supplementary-material-1 [file inline-supplementary-material-1.pdf]

<Winkel P. & al. \* Supplementary file S1>

### Supplementary file S1

**Table 1S** All-cause mortality hazard ratios (HR) of newer biochemical predictors not routinely used in clinical work when each of these predictors is used alone (columns 2 to 4), and when it is used in combination with the 'standard predictors'<sup>a</sup> (column 5 to 7). Two of them were then discarded and each of the remaining 10 was assessed when used in combination with the standard predictors and the remaining 9 of the 10 newer biochemical predictors selected among the 12 candidates (columns 8 to 10).

| Newer biochemical candidate predictor | When candidate predictor is the only predictor included in the model (stratified by centre) |              |         | When 'standard predictors' is added to the model (stratified by centre) |              |         | When in addition the 10 selected predictors are added to the model (stratified by centre) |              |         |
|---------------------------------------|---------------------------------------------------------------------------------------------|--------------|---------|-------------------------------------------------------------------------|--------------|---------|-------------------------------------------------------------------------------------------|--------------|---------|
|                                       | HR <sup>b</sup>                                                                             | 95% CI       | P       | HR                                                                      | 95% CI       | P       | HR                                                                                        | 95% CI       | P       |
| log (endostatin/ng/mL)                | 3.49                                                                                        | 2.81 to 4.33 | <0.0001 | 1.75                                                                    | 1.34 to 2.27 | <0.0001 | 1.23                                                                                      | 0.92 to 1.63 | 0.16    |
| log (OPG/ng/L)                        | 3.37                                                                                        | 2.88 to 3.94 | <0.0001 | 1.68                                                                    | 1.35 to 2.09 | <0.0001 | 1.21                                                                                      | 0.97 to 1.63 | 0.092   |
| log (sTNFR1/pg/mL)                    | 3.80                                                                                        | 3.19 to 4.54 | <0.0001 | 1.84                                                                    | 1.46 to 2.33 | <0.0001 | 1.10                                                                                      | 0.81 to 1.48 | 0.55    |
| og (sTNFR2/pg/mL)                     | 5.45                                                                                        | 4.40 to 6.76 | <0.0001 | 2.39                                                                    | 1.80 to 3.18 | <0.0001 | 1.43                                                                                      | 0.99 to 2.07 | 0.056   |
| log(proBNP/ng/L)                      | 1.76                                                                                        | 1.66 to 1.87 | <0.0001 | 1.44                                                                    | 1.34 to 1.55 | <0.0001 | 1.28                                                                                      | 1.19 to 1.39 | <0.0001 |
| log(hs-cTnT/ng/L)                     | 2.31                                                                                        | 2.16 to 2.47 | <0.0001 | 1.73                                                                    | 1.56 to 1.92 | <0.0001 | 1.46                                                                                      | 1.30 to 1.65 | <0.0001 |
| PAPP-A_binary <sup>c</sup>            | 1.84                                                                                        | 1.53 to 2.21 | <0.0001 | 1.39                                                                    | 1.15 to 1.68 | 0.0007  | 0.85                                                                                      | 0.69 to 1.03 | 0.10    |
| log (YKL40/μg/L)                      | 1.76                                                                                        | 1.59 to 1.95 | <0.0001 | 1.32                                                                    | 1.17 to 1.49 | <0.0001 | 1.10                                                                                      | 0.97 to 1.25 | 0.15    |
| log (NGAL/ng/L)                       | 1.33                                                                                        | 1.12 to 1.57 | 0.0011  | 1.03                                                                    | 0.85 to 1.24 | 0.78    | 0.90                                                                                      | 0.74 to 1.10 | 0.30    |
| log(Calprotectin/)                    | 1.08                                                                                        | 0.95 to 1.23 | 0.25    | 1.02                                                                    | 0.89 to 1.18 | 0.74    | Not included in analysis                                                                  |              |         |
| log (Cathepsin-B/μg/L)                | 2.81                                                                                        | 2.40 to 3.28 | <0.0001 | 1.43                                                                    | 1.19 to 1.73 | 0.0002  | 1.09                                                                                      | 0.89 to 1.33 | 0.42    |
| log (Cathepsin-S/μg/L)                | 1.12                                                                                        | 0.86 to 1.47 | 0.40    | 1.10                                                                    | 0.83 to 1.45 | 0.51    | Not included in analysis                                                                  |              |         |

a) The standard predictors are shown in Table 1.

b) Hazard ratio associated with unit increase on log scale, except for PAPP-A (binary).

<Winkel P. & al. \* Supplementary file S1>

c) Binary quantity. 1: PAPP-A was  $\geq 4$  mIU/L, 0: PAPP-A was  $< 4$  mIU/L.

### 1. Inferential impact of the newer biomarkers

As the proportional hazard's assumption was violated for age<sup>29</sup> and age interacted significantly with time since randomisation, we included an interaction between age at entry and time (since randomisation) in the inference analyses.

Table 1S shows the results of a Cox regression of all-cause death on each of the 12 biomarkers when the biomarker was used alone as a covariate (columns 2 through 4), and when it was used in combination with the 'standard predictors' (columns 5 through 7).

Columns 8 through 10 in Table 1S shows the result of a regression of the outcome on the 'standard predictors' and the 10 best biochemical predictors. Now only log (proBNP /ng/L) and log(hs-cTnT/ng/L) have a HR significantly ( $P < 0.01$ ) different from 1. Log(calprotectin/mg/L) and log(cathepsin-S/ $\mu\text{g/L}$ ) did not have an inferential impact ( $P < 0.01$  not attained), not even when used alone.

<Winkel P. & al. \* Supplementary file S1>

**Table 2S** the composite outcome (comprising first occurrence of acute myocardial infarction, unstable angina pectoris, cerebro-vascular disease, and death). Hazard ratios of each of 13 biochemical predictors not routinely used in clinical work when each of these predictors is used alone (columns 2 to 4), and when it is used in combination with the 'standard predictors' (column 5 to 7). Two of them were then discarded and each of the remaining 11 was assessed when used in combination with the standard predictors and the remaining 10 of the 11 newer biochemical predictors selected among the 13 candidates (columns 8 to 10)

| Newer biochemical candidate predictor  | When candidate predictor is the only predictor included in the model (stratified by centre) |              |         | When 'standard predictors' is added to the model (stratified by centre) |              |         | When in addition the 11 <sup>a</sup> selected predictors are added to the model (stratified by centre) |                |         |
|----------------------------------------|---------------------------------------------------------------------------------------------|--------------|---------|-------------------------------------------------------------------------|--------------|---------|--------------------------------------------------------------------------------------------------------|----------------|---------|
|                                        | HR                                                                                          | 95% CI of HR | P       | HR                                                                      | 95% CI of HR | P       | HR                                                                                                     | 95% CI of HR   | P       |
| log (Endostatin/ng/mL)                 | 2.18                                                                                        | 1.84 to 2.58 | <0.0001 | 1.44                                                                    | 1.17 to 1.72 | 0.0006  | 1.23                                                                                                   | 0.99 to 1.54   | 0.062   |
| log (OPG/ng/L)                         | 1.34                                                                                        | 1.05 to 1.71 | 0.019   | 0.94                                                                    | 0.70 to 1.26 | 0.67    | 0.78                                                                                                   | 0.58 to 1.04   | 0.094   |
| log (OPG/ng/L) ·time/year <sup>b</sup> | 1.11                                                                                        | 1.06 to 1.16 | <0.0001 | 1.09                                                                    | 1.03 to 1.16 | 0.0022  | 1.104                                                                                                  | 1.044 to 1.168 | 0.0005  |
| log (sTNFR1/pg/mL)                     | 2.14                                                                                        | 1.86 to 2.46 | <0.0001 | 1.33                                                                    | 1.11 to 1.60 | 0.0021  | 1.05                                                                                                   | 0.84 to 1.32   | 0.67    |
| log (sTNFR2/pg/mL)                     | 2.56                                                                                        | 2.15 to 3.03 | <0.0001 | 1.49                                                                    | 1.19 to 1.85 | 0.0004  | 1.13                                                                                                   | 0.85 to 1.50   | 0.40    |
| log (proBNP/ng/L)                      | 1.37                                                                                        | 1.31 to 1.44 | <0.0001 | 1.26                                                                    | 1.19 to 1.33 | <0.0001 | 1.18                                                                                                   | 1.11 to 1.25   | <0.0001 |
| log (hs-cTnT/ng/L)                     | 1.83                                                                                        | 1.70 to 1.97 | <0.0001 | 1.49                                                                    | 1.35 to 1.64 | <0.0001 | 1.31                                                                                                   | 1.17 to 1.46   | <0.0001 |
| PaPP-A (binary) <sup>c</sup>           | 1.45                                                                                        | 1.24 to 1.70 | <0.0001 | 1.24                                                                    | 1.06 to 1.46 | 0.0077  | 0.89                                                                                                   | 0.75 to 1.05   | 0.15    |
| log (YKL40/μg/L)                       | 1.35                                                                                        | 1.24 to 1.47 | <0.0001 | 1.13                                                                    | 1.03 to 1.24 | 0.013   | 1.01                                                                                                   | 0.91 to 1.11   | 0.93    |
| log (NGAL/ng/L)                        | 1.23                                                                                        | 1.08 to 1.40 | 0.0023  | 1.03                                                                    | 0.89 to 1.19 | 0.73    | 0.97                                                                                                   | 0.84 to 1.13   | 0.74    |
| log (Calprotectin/)                    | 1.06                                                                                        | 0.95 to 1.17 | 0.32    | 1.00                                                                    | 0.90 to 1.12 | 0.95    | Not included in analysis                                                                               |                |         |
| log (cathepsin-B/μg/L)                 | 1.70                                                                                        | 1.50 to 1.93 | <0.0001 | 1.17                                                                    | 1.01 to 1.35 | 0.040   | 0.99                                                                                                   | 0.85 to 1.16   | 0.92    |
| log (cathepsin-S/μg/L)                 | 1.06                                                                                        | 0.86 to 1.31 | 0.59    | 0.98                                                                    | 0.79 to 1.22 | 0.88    | Not included in analysis                                                                               |                |         |

<Winkel P. & al. \* Supplementary file S1>

- a) Note that now a time dependent covariate has been added [ $\log(\text{OPG}/\text{ng/L}) \cdot \text{time}/\text{year}$ ] to the 10 original predictors.
- b)  $\log(\text{OPG}/\text{ng/L})$  significantly violated the proportional hazard assumption. We found a significant linear relationship between  $\log(\text{OPG}/\text{ng/L})$  and time since randomisation which may explain the violation. The product of  $\log(\text{OPG}/\text{ng/L})$  and time/year was therefore included in the inference analysis. However, when the Cox model is used for prediction, time dependent covariates are not allowed (SAS 9.4). Therefore, in the latter context we only include  $\log(\text{OPG}/\text{ng/L})$ .
- c) Binary quantity. 1: PAPP-A was  $\geq 4$  mIU/L, 0: PAPP-A was  $< 4$  mIU/L.

Table 2S corresponds to Table 1S except that the outcome is the composite outcome. It is noted that a time-dependent covariate is now included because  $\log(\text{OPG}/\text{ng/L})$  violated the proportional hazard assumption. This was remedied by including the covariate  $\log(\text{OPG}/\text{ng/L}) \cdot \text{time}/\text{year}$ . It is seen that when all the biomarkers were included in the Cox analysis  $\log(\text{OPG}/\text{ng/L}) \cdot \text{time}/\text{year}$ ,  $\log(\text{proBNP}/\text{ng/L})$ , and  $\log(\text{hs-cTnT}/\text{ng/L})$  were the only ones which had a P value below the threshold of 0.01. Again  $\log(\text{calprotectin}/\text{mg/L})$  and  $\log(\text{cathepsin-S}/\mu\text{g/L})$  could be excluded from the final analysis, the result of which is shown in columns 8 through 10.

## 2. Practical impact of the novel biomarkers

**Table 3S** All-cause death. Correct predictions of favorable (alive) and unfavorable (not alive) status made at 3 years, at 6 years, and at 9 years following randomisation in the 1998 placebo patients from the CLARICOR trial. Four covariate scenarios were examined with Cox regression (see text of columns 4, 5, 6, and 8). For comparison with the results of column 6, column 7 shows the corresponding results when the accelerated failures model was used.

&lt;Winkel P. &amp; al. \* Supplementary file S1&gt;

| (1)<br>Number of<br>predictions<br>made | (2)<br>Time at<br>which<br>prediction<br>was made | (3)<br>Correctly<br>predicted<br>patient status | (4)<br>Data<br><br>without<br>covariates<br>included<br><br>Both<br>models<br>N (%) | (5)<br>Data<br><br>including<br>Standard<br>predictors<br>as<br>covariates<br><br>Cox<br>model<br>N (%) | (6)<br>Data<br><br>including<br>Standard<br>predictors<br>+<br>advanced<br>biochemical<br>predictors as<br>covariates<br><br>Cox<br>model<br>N (%) | (7)<br>Data<br><br>including<br>Standard<br>predictors<br>+<br>advanced<br>biochemical<br>predictors as<br>covariates<br><br>Parametric<br>model<br>N (%) | (8)<br>Data<br><br>including<br>Standard predictors<br>+<br>log(OPG/ng/L)<br>+<br>log (hs-cTnT/ng/L)<br>and<br>log(proBNP/ng/L)<br><br>as covariates<br><br>Cox<br>Model<br>N (%) |
|-----------------------------------------|---------------------------------------------------|-------------------------------------------------|-------------------------------------------------------------------------------------|---------------------------------------------------------------------------------------------------------|----------------------------------------------------------------------------------------------------------------------------------------------------|-----------------------------------------------------------------------------------------------------------------------------------------------------------|-----------------------------------------------------------------------------------------------------------------------------------------------------------------------------------|
| 1996                                    | Three years                                       | Favorable status                                | 1825 (91.4)                                                                         | 1821 (91.2)                                                                                             | 1816 (91.0)                                                                                                                                        | 1814 (90.9)                                                                                                                                               | 1816 (91.0)                                                                                                                                                                       |
|                                         |                                                   | Unfavorable status                              | 0 (0.00)                                                                            | 10 (0.50)                                                                                               | 19 (0.95)                                                                                                                                          | 14 (0.70)                                                                                                                                                 | 19 (0.95)                                                                                                                                                                         |
| 1989                                    | Six years                                         | Favorable status                                | 1601 (80.5)                                                                         | 1555 (78.2)                                                                                             | 1551 (78.0)                                                                                                                                        | 1538 (77.3)                                                                                                                                               | 1553 (78.1)                                                                                                                                                                       |
|                                         |                                                   | Unfavorable status                              | 0 (0.00)                                                                            | 85 (4.27)                                                                                               | 120 (6.03)                                                                                                                                         | 118 (5.93)                                                                                                                                                | 113 (5.68)                                                                                                                                                                        |
| 1987                                    | Nine years                                        | Favorable status                                | 1342 (67.5)                                                                         | 1192 (60.0)                                                                                             | 1219 (61.3)                                                                                                                                        | 1217 (61.2)                                                                                                                                               | 1212 (61.0)                                                                                                                                                                       |
|                                         |                                                   | Unfavorable status                              | 0 (0.00)                                                                            | 297 (14.9)                                                                                              | 331(16.7)                                                                                                                                          | 323 (16.3)                                                                                                                                                | 339 (17.1)                                                                                                                                                                        |
| 5972                                    | All three<br>times<br>combined                    | Favorable status                                | 4768 (79.8)                                                                         | 4585 (76.8)                                                                                             | 4586 (76.8)                                                                                                                                        | 4569 (76.5)                                                                                                                                               | 4581 (76.7)                                                                                                                                                                       |
|                                         |                                                   | Unfavorable status                              | 0 (0.00)                                                                            | 392 (6.56)                                                                                              | 470 (7.87)                                                                                                                                         | 364 (6.10)                                                                                                                                                | 471 (7.89)                                                                                                                                                                        |
|                                         |                                                   | Total                                           | 4768 (79.8)                                                                         | 4977 (83.3)                                                                                             | 5056 (84.7)                                                                                                                                        | 4933 (82.6)                                                                                                                                               | 5052 (84.6)                                                                                                                                                                       |

[<Winkel P. & al. \\* Supplementary file S1>](#)

The results of the predictions of survival status made at 3 years, at 6 years, and at 9 years following randomisation in the 1998 placebo patients are summarized in Table 3S.

When the 'standard predictors' were included as covariates (column 5) for all-cause mortality, 83.3% of the predictions were correct.

Adding the 10 newer biochemical predictors (column 6) the percentage was increased by 1.4% to 84.7%.

<Winkel P. & al. \* Supplementary file S1>

**Figure 1S A**

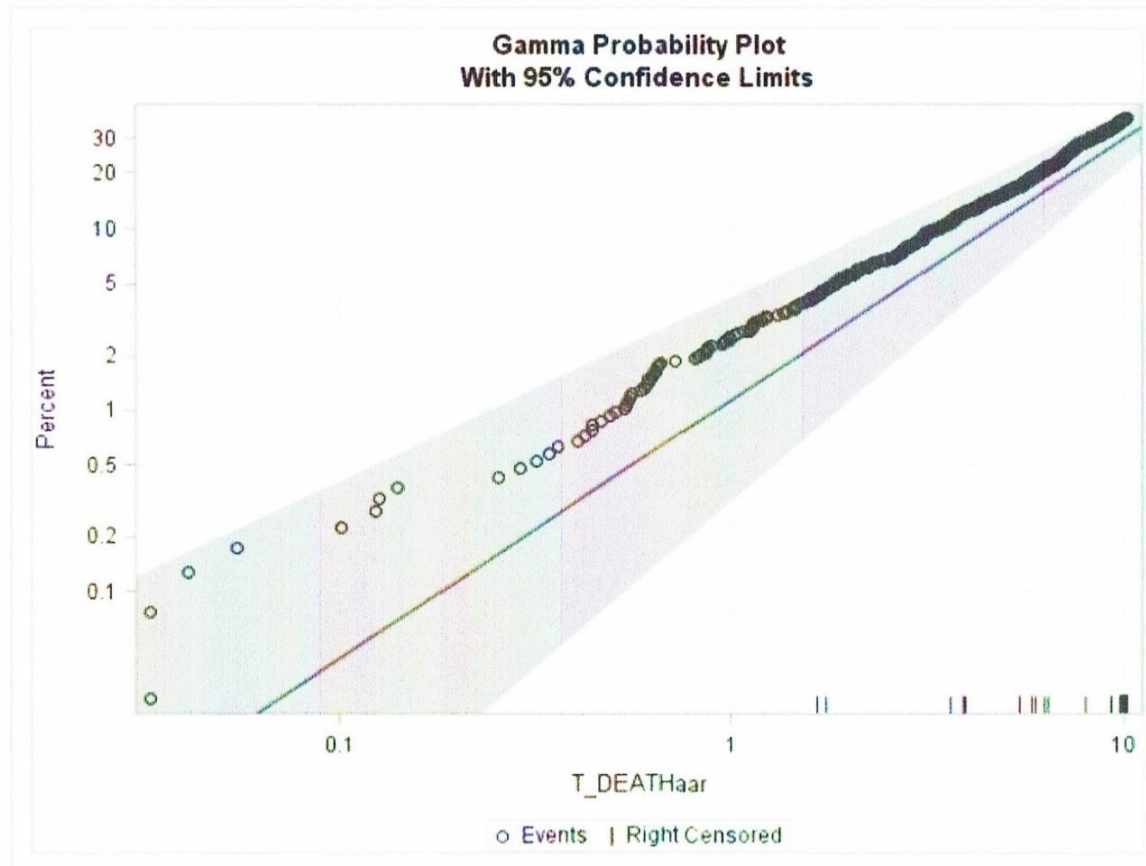

[<Winkel P. & al. \\* Supplementary file S1>](#)

**Figure 1S B**



<Winkel P. & al. \* Supplementary file S1>

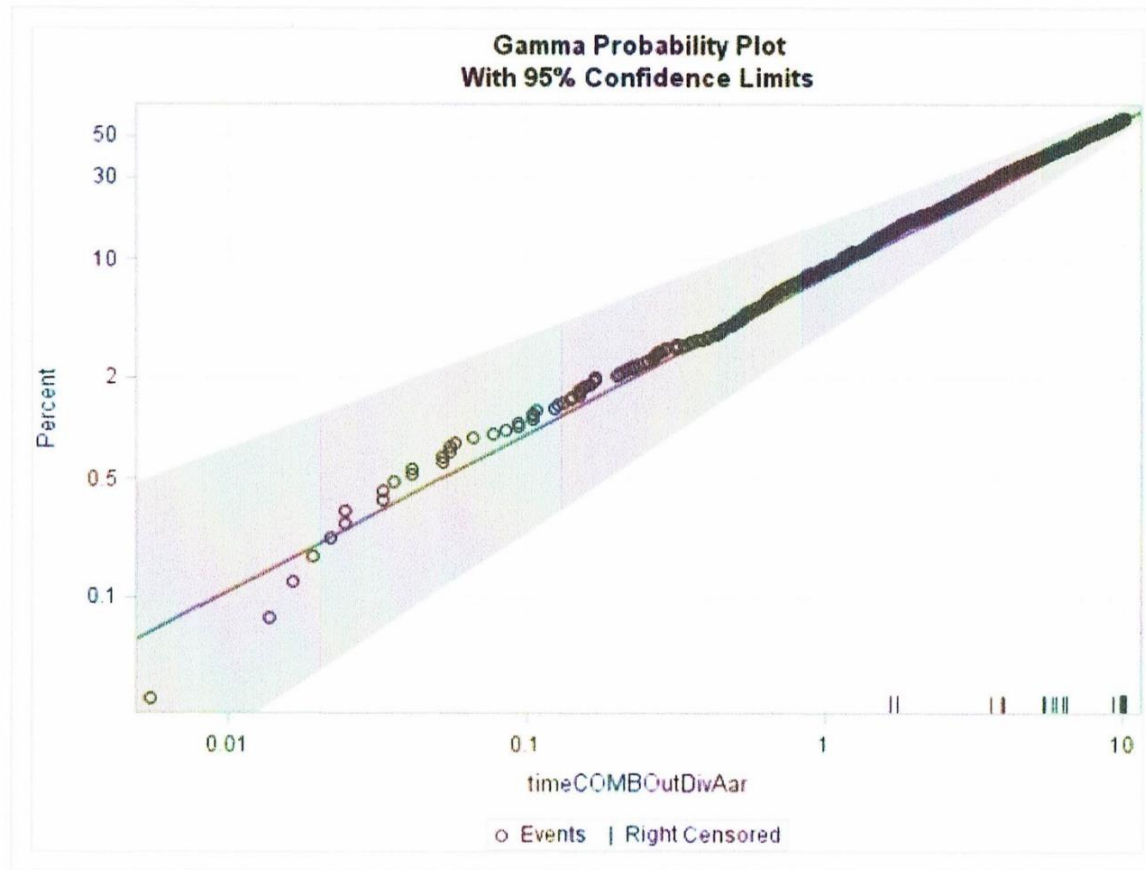

[<Winkel P. & al. \\* Supplementary file S1>](#)

The parametric model fitted the data reasonably well (see figure 1S A and B). The distribution of years to outcome using the accelerated failure model where the error term is modelled using the general gamma distribution showed that for both outcomes all values were within the 95% confidence limits. However, in case of all-cause death (see figure 1S A) the distribution was upwards biased but still within the 95% confidence limits.

It is noted that the results obtained with the parametric model (column 7 Tables S3 and S4) are not dramatically different from the corresponding results in column 6, when this theoretically equally valid model is used. When only the three significant predictors  $\log(\text{OPG}/\text{ng/L})$ ,  $\log(\text{proBNP}/\text{ng/L})$ , and  $\log(\text{hs-cTnT}/\text{ng/L})$  were used in the Cox model in place of all 10 (column 8), the results were practically unaffected (compare columns 8 and 6).

<Winkel P. & al. \* Supplementary file S1>

**Table 4S** the composite outcome of AMI, UAP, CeVD, and all-cause death. Correct predictions of favorable (no outcome so far) and unfavorable status made at 3, 6 and 9 years. Cox model: four covariate scenarios as in Table 4; and parametric model (column 7) for comparison with column 6. Note that log (OPG) qualified for inclusion in column 8.

| (1)<br>Number of<br>predictions<br>made | (2)<br>Time at<br>which<br>prediction<br>was made | (3)<br>Correctly<br>predicted<br>patient<br>status | (4)<br>Data<br><br>without<br>covariates<br>included<br><br>Both<br>models<br>N (%) | (5)<br>Data<br><br>including<br>Standard<br>predictors as<br>covariates<br><br>Cox<br>model<br>N (%) | (6)<br>Data<br><br>including<br>Standard<br>predictors<br>+<br>advanced<br>biochemical<br>predictors as<br>covariates<br><br>Cox<br>model<br>N (%) | (7)<br>Data<br><br>including<br>Standard<br>predictors<br>+<br>advanced<br>biochemical<br>predictors as<br>covariates<br>Parametric<br>model<br>N (%) | (8)<br>Data<br><br>including<br>Standard predictors<br>+<br>Log(OPG/ng/L),<br>Log(hs-cTnT/ng/L),<br>and<br>log(proBNP/ng/L)<br>as covariates<br><br>Cox model<br>N (%) |
|-----------------------------------------|---------------------------------------------------|----------------------------------------------------|-------------------------------------------------------------------------------------|------------------------------------------------------------------------------------------------------|----------------------------------------------------------------------------------------------------------------------------------------------------|-------------------------------------------------------------------------------------------------------------------------------------------------------|------------------------------------------------------------------------------------------------------------------------------------------------------------------------|
| 1996                                    | Three<br>years                                    | Favorable<br>status                                | 1514 (75.9)                                                                         | 1471 (73.7)                                                                                          | 1464 (73.3)                                                                                                                                        | 1479 (74.1)                                                                                                                                           | 1463 (73.3)                                                                                                                                                            |
|                                         |                                                   | Unfavorable<br>status                              | 0 (0)                                                                               | 51 (2.56)                                                                                            | 77 (3.86)                                                                                                                                          | 57 (2.86)                                                                                                                                             | 76 (3.81)                                                                                                                                                              |
| 1989                                    | Six years                                         | Favorable<br>status                                | 1144 (57.5)                                                                         | 935 (47.0)                                                                                           | 920 (46.3)                                                                                                                                         | 916 (46.1)                                                                                                                                            | 925 (46.5)                                                                                                                                                             |
|                                         |                                                   | Unfavorable<br>status                              | 0 (0)                                                                               | 349 (17.5)                                                                                           | 370 (18.6)                                                                                                                                         | 368 (18.5)                                                                                                                                            | 367 (18.5)                                                                                                                                                             |
| 1987                                    | Nine years                                        | Favorable<br>status                                | 0 (0)                                                                               | 504 (25.4)                                                                                           | 542 (27.3)                                                                                                                                         | 550 (27.7)                                                                                                                                            | 549 (27.6)                                                                                                                                                             |
|                                         |                                                   | Unfavorable<br>status                              | 1115 (56.1)                                                                         | 774 (39.0)                                                                                           | 792 (39.9)                                                                                                                                         | 803 (40.4)                                                                                                                                            | 779 (39.2)                                                                                                                                                             |
| 5972                                    | All three<br>times<br>combined                    | Favorable<br>status                                | 2658 (44.5)                                                                         | 2910 (48.7)                                                                                          | 2926 (49.0)                                                                                                                                        | 2945 (49.3)                                                                                                                                           | 2937 (49.2)                                                                                                                                                            |
|                                         |                                                   | Unfavorable<br>status                              | 1115 (18.7)                                                                         | 1174 (19.7)                                                                                          | 1239 (20.7)                                                                                                                                        | 1228 (20.6)                                                                                                                                           | 1222 (20.5)                                                                                                                                                            |
|                                         |                                                   | Total                                              | 3773 (63.2)                                                                         | 4084 (68.4)                                                                                          | 4165 (69.7)                                                                                                                                        | 4173 (69.9)                                                                                                                                           | 4159 (69.6)                                                                                                                                                            |

<Winkel P. & al. \* Supplementary file S1>

Table 4S shows the results corresponding to Table 3S obtained when the composite outcome was used. Including the 'standard predictors' in the model increases the percent correct predictions from 63.2 (see column 4, Table 4S) to 68.4 (see column 5, Table 4S), i.e. an increase of 5.2%. Adding the 10 newer biomarkers to the model increases the number of correct predictions by 1.3%. Using the parametric model does not change the results appreciably and neither does a reduction of the biomarkers to include only the three significant ones.

#### **Legend to figure 1S**

Figure 1S A Distribution of years to death using the accelerated failure model where the error term is modelled using the general gamma distribution.

Figure 1S B Distribution of years to composite outcome (AMI, UAP, CeVD, death) using the accelerated failure model where the error term is modelled using the general gamma distribution.
